# Supplementary material for: Modulation of Human Hsp90α Conformational Dynamics by Allosteric Ligand Interaction at the C-Terminal Domain
Source: PubMed Central journal article supplement (PMC6367426; doi:10.1038/s41598-018-35835-0), 2019-02-07
Supplement: 41598_2018_35835_MOESM1_ESM.pdf [file 41598_2018_35835_MOESM1_ESM.pdf]

# Modulation of Human Hsp90 $\alpha$ Conformational Dynamics by Allosteric Ligand Interaction at the C-Terminal Domain

*David L. Penkler<sup>1</sup> and Özlem Tastan Bishop<sup>1\*</sup>*

<sup>1</sup>Research Unit in Bioinformatics (RUBi), Department of Biochemistry and Microbiology,  
Rhodes University, Grahamstown, 6140, South Africa

\*Correspondence should be addressed to (email: [o.tastanbishop@ru.ac.za](mailto:o.tastanbishop@ru.ac.za))

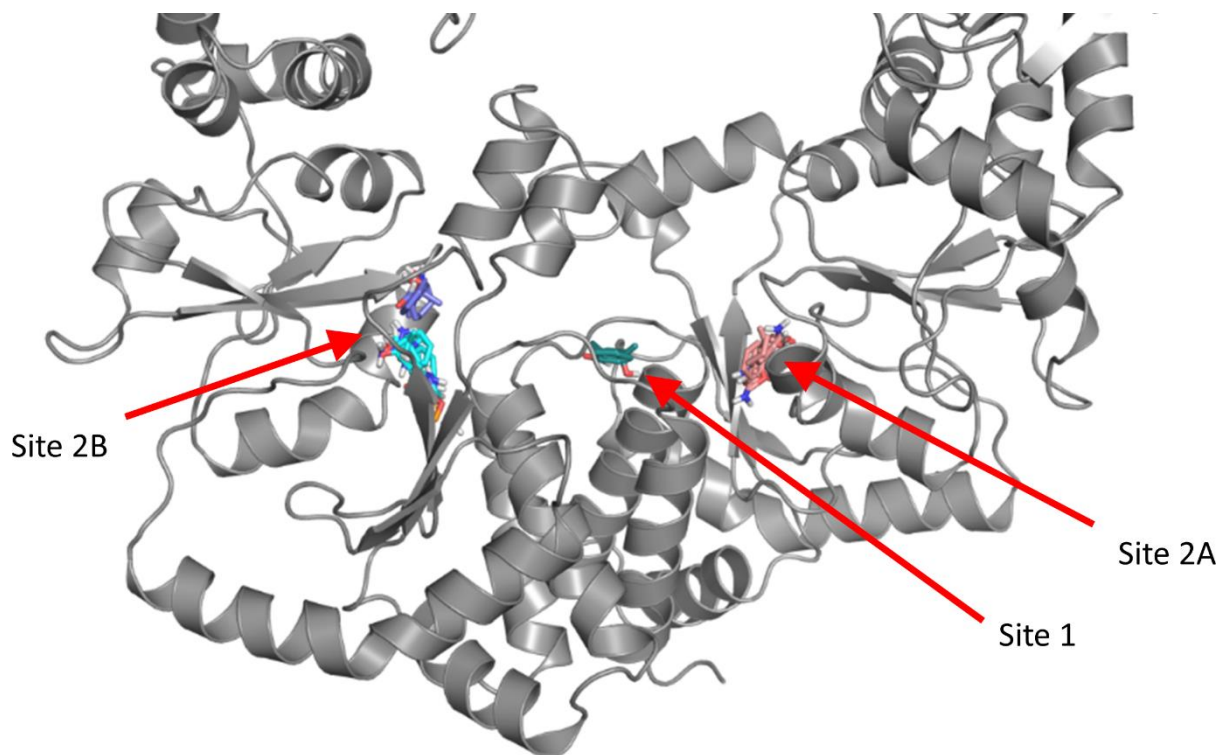

**Figure S1: FTMap unbiased screen reveals two putative ligand binding sites in the CTD.** Site 1 is located at the four-helix bundle. Site 2 is mirrored in both protomers site 2A and 2B respectively.

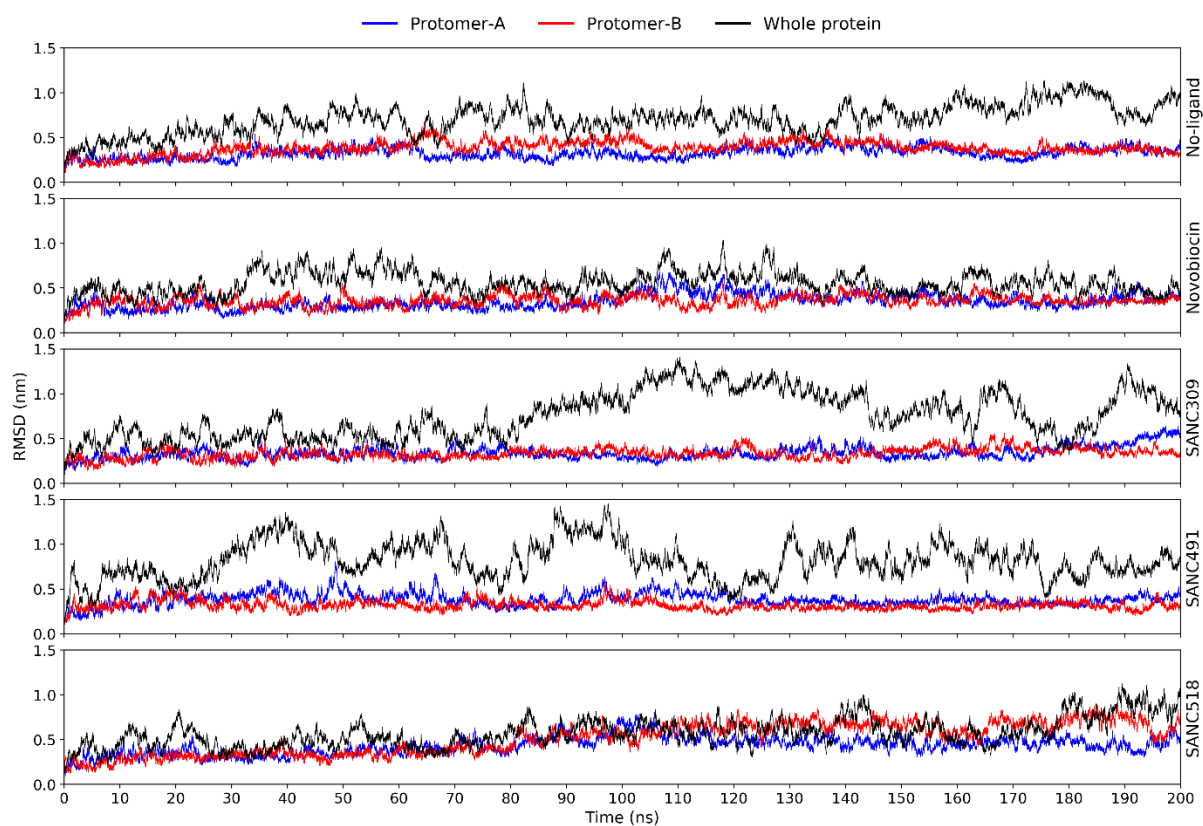

**Figure S2: RMSD plots for each ligand bound complex:** Black denotes the whole protein backbone RMSD, while blue and red denote the backbone RMSD of each individual protomer

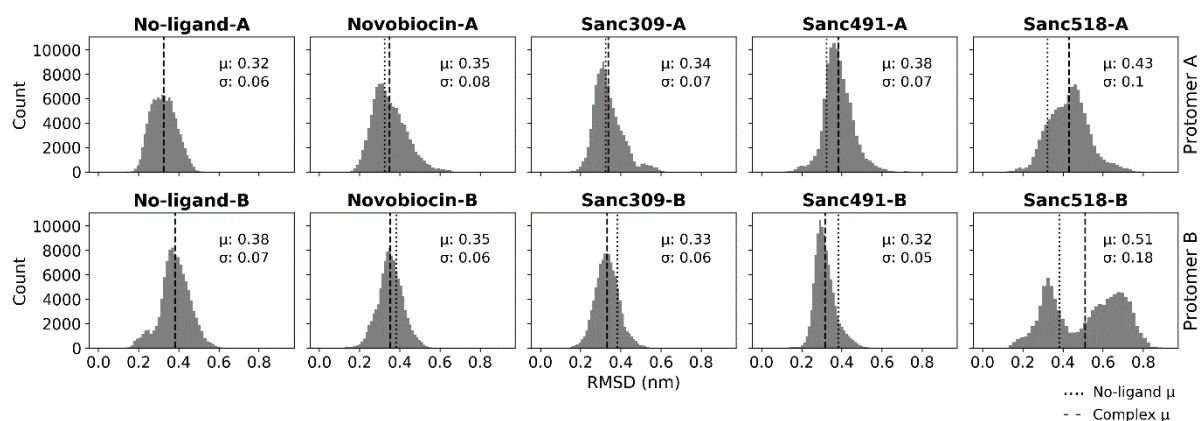

**Figure S3: Protomer backbone RMSD distribution plots.** Comparison of the histogram distribution plots for each ligand bound complex with the ligand-free state. In each case, the shift in the conformational distribution over the 200 ns MD trajectory can be visually assessed by comparing the mean ( $\mu$ ) of each complex (dashed line) with the ligand-free complex (dotted line).

**Table S1: Whole protein and individual protomer RMSD distribution statistics.** The means of each ligand bound complex was compared to the ligand-free system using the z-test statistic with  $\alpha = 0.05$  and a null hypothesis of  $H_1 - H_2 = 0$ . The two-sample KS-test statistic was computed to compare the difference in shape between the ligand un/bound systems. The Wilcoxon stat was used to assess the difference between the ligand un/bound distributions.

|                     | Mean | Variance | Std. | Wilcoxon | $p$  | Z-stat  | $p$  | KS-stat | $p$  |
|---------------------|------|----------|------|----------|------|---------|------|---------|------|
| <b>No-ligand</b>    | 0.70 | 0.03     | 0.16 | -        | -    | -       | -    | -       | -    |
| <b>Novobiocin</b>   | 0.56 | 0.02     | 0.12 | -201.86  | 0.00 | -219.90 | 0.00 | 0.16    | 0.51 |
| <b>Sanc309</b>      | 0.76 | 0.07     | 0.26 | 33.21    | 0.00 | 55.48   | 0.00 | 0.18    | 0.36 |
| <b>Sanc491</b>      | 0.81 | 0.04     | 0.21 | 120.36   | 0.00 | 134.08  | 0.00 | 0.08    | 1.00 |
| <b>Sanc518</b>      | 0.57 | 0.03     | 0.16 | -172.15  | 0.00 | -177.47 | 0.00 | 0.10    | 0.95 |
| <b>No-ligand-A</b>  | 0.32 | 0.00     | 0.06 | -        | -    | -       | -    | -       | -    |
| <b>Novobiocin-A</b> | 0.35 | 0.01     | 0.08 | 59.91    | 0.00 | 75.75   | 0.00 | 0.14    | 0.68 |
| <b>Sanc309-A</b>    | 0.34 | 0.01     | 0.07 | 28.37    | 0.00 | 42.61   | 0.00 | 0.12    | 0.84 |
| <b>Sanc491-A</b>    | 0.38 | 0.01     | 0.07 | 180.25   | 0.00 | 193.62  | 0.00 | 0.14    | 0.68 |
| <b>Sanc518-A</b>    | 0.43 | 0.01     | 0.10 | 242.90   | 0.00 | 282.52  | 0.00 | 0.18    | 0.36 |
| <b>No-ligand-B</b>  | 0.38 | 0.01     | 0.07 | -        | -    | -       | -    | -       | -    |
| <b>Novobiocin-B</b> | 0.35 | 0.00     | 0.06 | -96.29   | 0.00 | -91.41  | 0.00 | 0.08    | 1.00 |
| <b>Sanc309-B</b>    | 0.33 | 0.00     | 0.06 | -165.11  | 0.00 | -165.15 | 0.00 | 0.10    | 0.95 |
| <b>Sanc491-B</b>    | 0.32 | 0.00     | 0.05 | -218.05  | 0.00 | -227.32 | 0.00 | 0.12    | 0.84 |
| <b>Sanc518-B</b>    | 0.51 | 0.03     | 0.18 | 150.36   | 0.00 | 214.71  | 0.00 | 0.20    | 0.24 |

**Table S2: Inter-protomer distance distribution statistics.** The means of each ligand bound complex was compared to the ligand-free system using the z-test statistic with  $\alpha = 0.05$  and a null hypothesis of  $H1 - H2 = 0$ . The two-sample KS-test statistic was computed to compare the difference in shape between the ligand un/bound systems. The Wilcoxon stat was used to assess the difference between the ligand un/bound distributions.

|            | Mean | Variance | Std. | Wilcoxon | $p$  | Z-stat | $p$  | KS-stat | $p$  |
|------------|------|----------|------|----------|------|--------|------|---------|------|
| No-ligand  | 7.00 | 0.35     | 0.59 | -        | -    | -      | -    | -       | -    |
| Novobiocin | 7.40 | 0.40     | 0.63 | 124.58   | 0.00 | 36.14  | 0.00 | 0.08    | 1.00 |
| SANC309    | 6.60 | 0.40     | 0.63 | -136.46  | 0.00 | 36.14  | 0.00 | 0.18    | 0.36 |
| SANC491    | 8.09 | 0.49     | 0.70 | 288.06   | 0.00 | 36.14  | 0.00 | 0.14    | 0.68 |
| SANC518    | 7.12 | 0.66     | 0.81 | 39.26    | 0.00 | 36.14  | 0.00 | 0.10    | 0.95 |

**Table S3: NTD-CTD distance distribution statistics.** The means of each ligand bound complex was compared to the ligand-free system using the z-test statistic with  $\alpha = 0.05$  and a null hypothesis of  $H1 - H2 = 0$ . The two-sample KS-test statistic was computed to compare the difference in shape between the ligand un/bound systems. The Wilcoxon stat was used to assess the difference between the ligand un/bound distributions.

|              | Mean | Variance | Std. | Wilcoxon | $p$  | Z-stat | $p$  | KS-stat | $p$  |
|--------------|------|----------|------|----------|------|--------|------|---------|------|
| No-ligand-A  | 8.21 | 0.06     | 0.24 | -        | -    | -      | -    | -       | -    |
| Novobiocin-A | 8.64 | 0.24     | 0.49 | 243.82   | 0.00 | 248.97 | 0.00 | 0.12    | 0.84 |
| SANC309-A    | 8.42 | 0.67     | 0.82 | 133.08   | 0.00 | 77.49  | 0.00 | 0.16    | 0.51 |
| SANC491-A    | 8.11 | 0.97     | 0.99 | 30.39    | 0.00 | -30.98 | 0.00 | 0.26    | 0.06 |
| SANC518-A    | 7.90 | 1.49     | 1.22 | 6.06     | 0.00 | -78.17 | 0.00 | 0.36    | 0.00 |
| No-ligand-B  | 7.63 | 0.10     | 0.32 | -        | -    | -      | -    | -       | -    |
| Novobiocin-B | 7.75 | 0.09     | 0.29 | 83.65    | 0.00 | 85.86  | 0.00 | 0.20    | 0.24 |
| SANC309-B    | 8.01 | 1.01     | 1.01 | 211.95   | 0.00 | 112.62 | 0.00 | 0.14    | 0.68 |
| SANC491-B    | 8.06 | 0.14     | 0.37 | 267.11   | 0.00 | 277.49 | 0.00 | 0.18    | 0.36 |
| SANC518-B    | 7.91 | 0.21     | 0.46 | 170.17   | 0.00 | 156.74 | 0.00 | 0.12    | 0.84 |

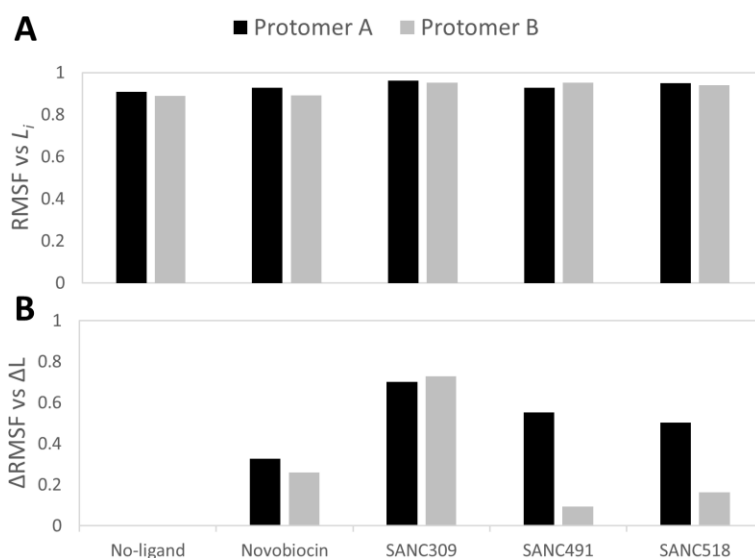

**Figure S4: Pearson's correlation coefficients showing the relationship between: (A)  $L_i$  vs RMSF; (B)  $\Delta$ RMSF vs  $\Delta L_i$**

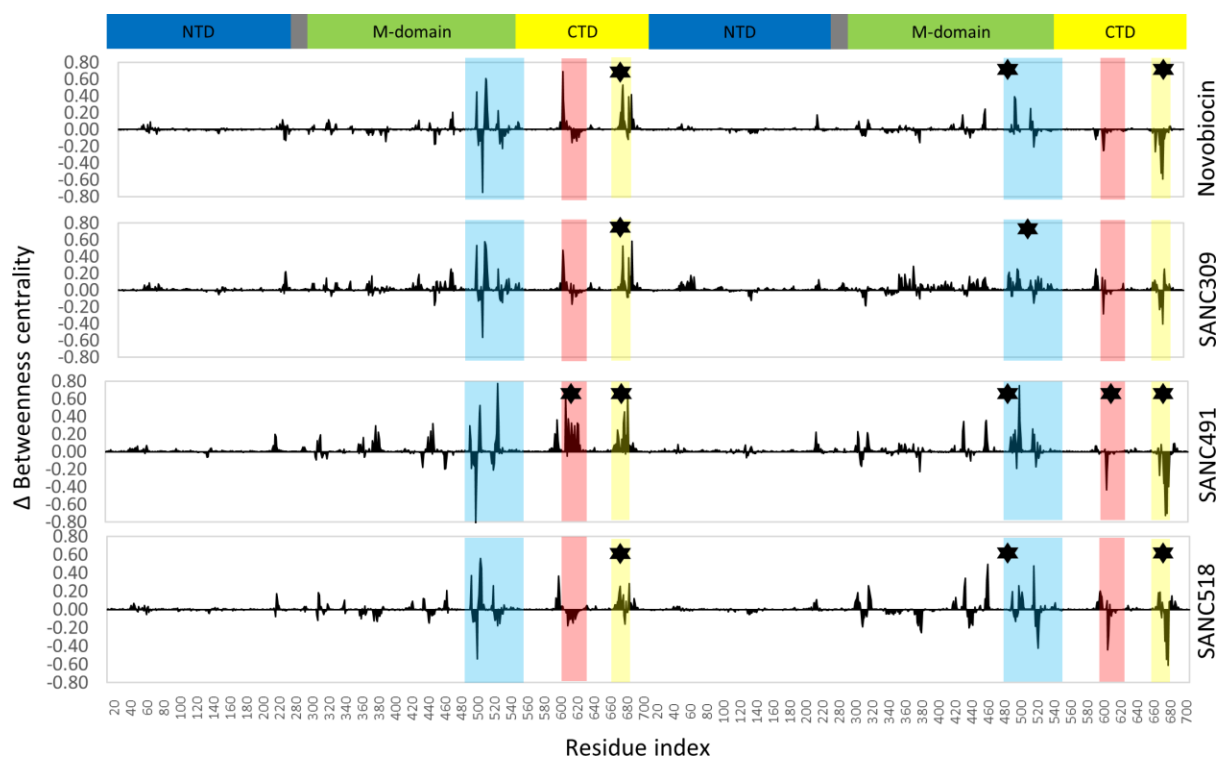

**Figure S5: Change in betweenness centrality ( $\Delta BC$ ) for the ligand bound complexes relative to the ligand free system.** Shaded regions denote binding site residues: blue sub-pocket, red helix<sub>2</sub>, yellow four-helix bundle. ★ denote participating ligand interactions at the two ligand binding sites.

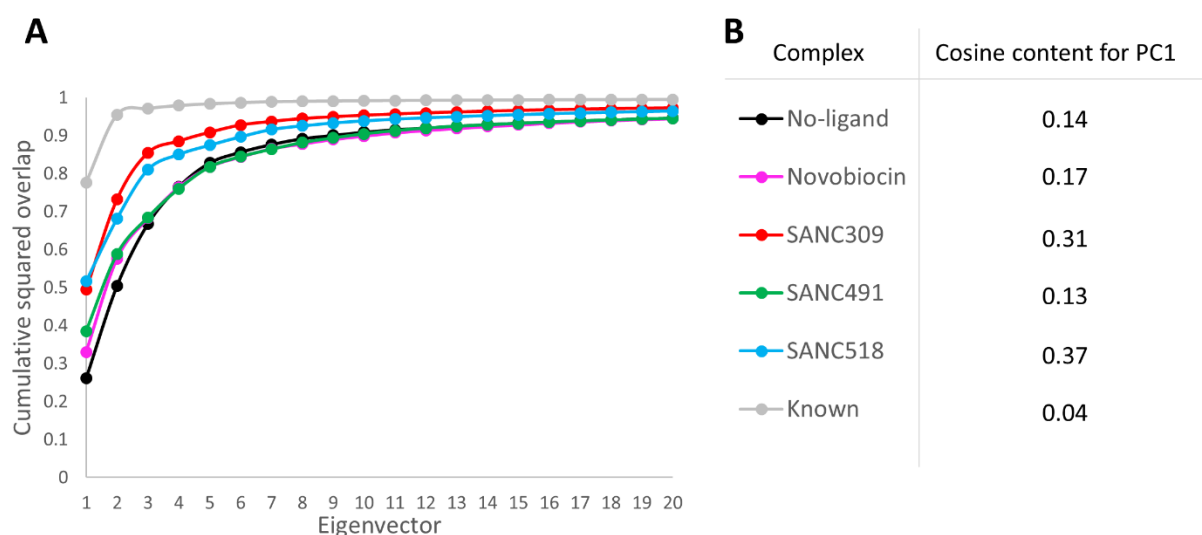

**Figure S6: (A) Cumulative squared overlap for the first 20 eigenvectors and (B) cosine content for the first eigenvector.** Results for the concatenated known conformational states are labelled “Known” and colored grey.

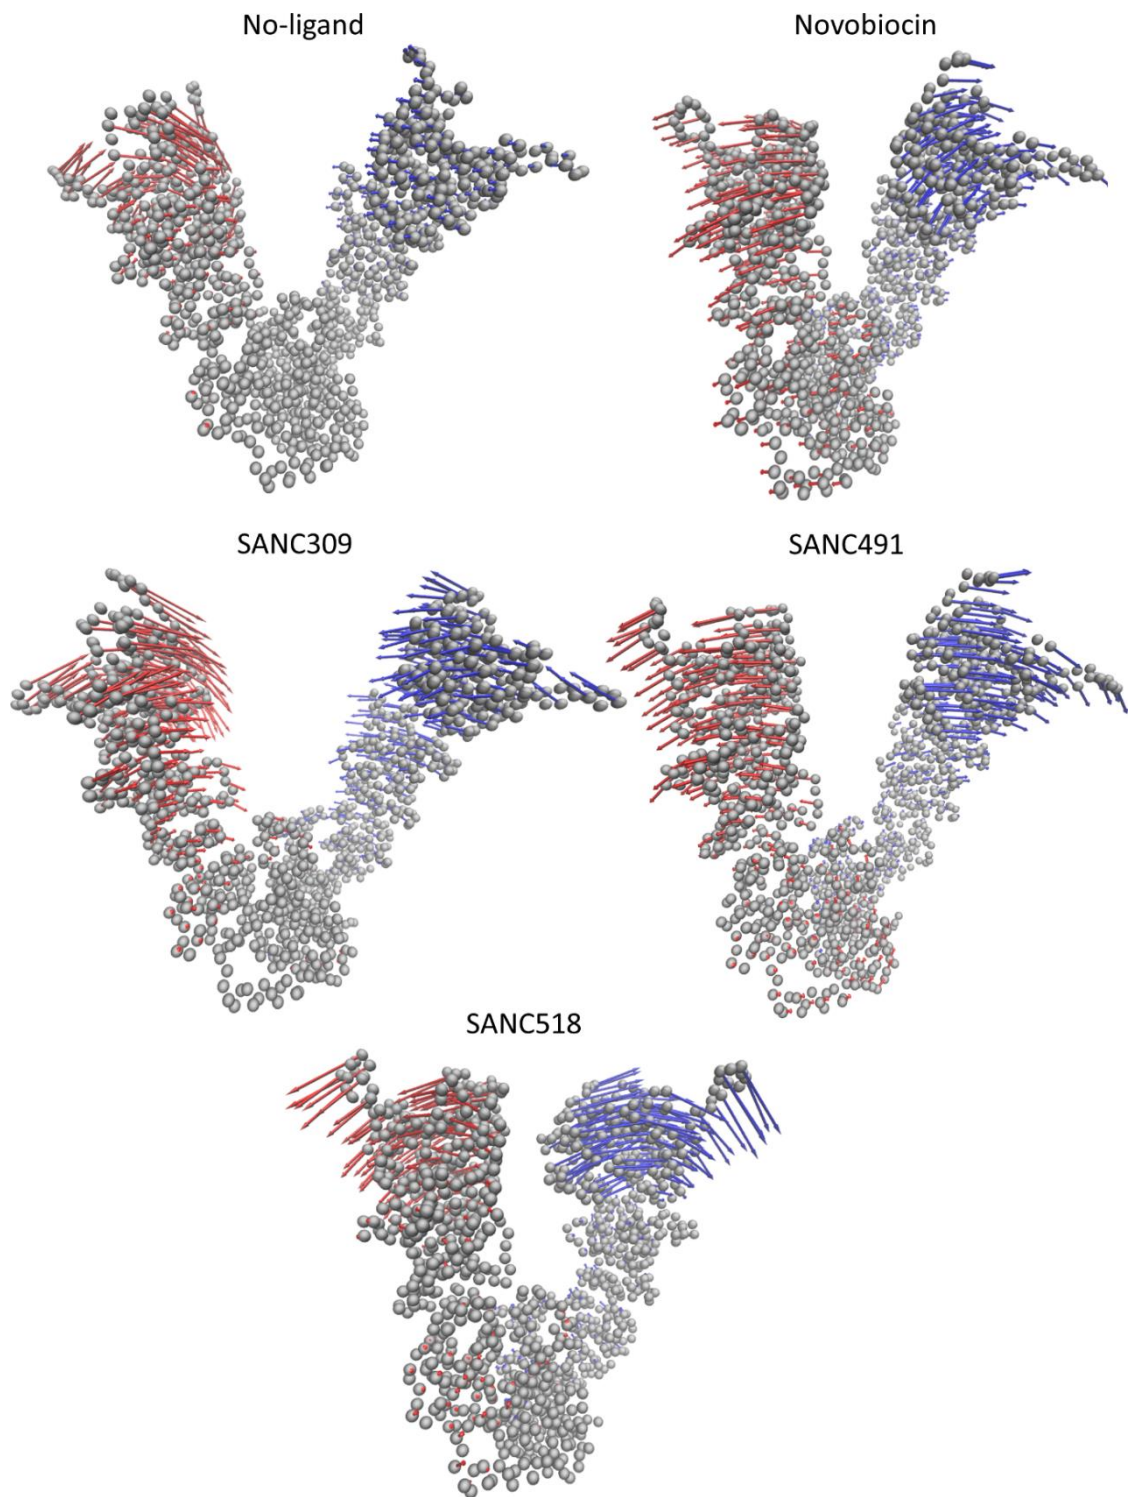

**Figure S7: Side view illustrating atomic displacements of first eigenvector of each Hsp90 complex** The Hsp90 complex is represented by  $C_{\alpha}$  atoms (grey spheres) and the arrows describe the relative direction and magnitude of the atomic displacements for protomer A (blue) and protomer B (red). Displacement arrows drawn for every 2<sup>nd</sup>  $C_{\alpha}$  atom to simplify presentation

**Movie S1: Correlated motions for the ligand-free complex:** depicting dimer closure as protomer A (green) approaches protomer B (cyan)

**Movie S2: Correlated motions for the Novobiocin complex:** depicting dimer opening as protomer A (green) and protomer B (cyan) displace in opposite directions

**Movie S3: Correlated motions for the SANC309 complex:** depicting dimer closure as protomer A (green) approaches protomer B (cyan)

**Movie S4: Correlated motions for the SANC491 complex:** depicting dimer opening as protomer A (green) and protomer B (cyan) displace in opposite direction

**Movie S5: Correlated motions for the SANC518 complex:** depicting dimer opening as protomer A (green) and protomer B (cyan) displace in opposite directions
